# Supplementary material for: Comparative study of donor atom effects on the thermodynamic and electron-transfer kinetic properties of copper(ii/i) complexes with sexadentate macrocyclic ligands. [CuII/I([18]aneS4N2)] and [CuII/I([18]aneS4O2)]
Source: Royal Society of Chemistry journal article supplement (doi:10.1039/b612252c), 2006-11-28
Supplement: b612252c.pdf [file b612252c.pdf]

**Comparative Study of Donor Atom Effects on the  
Thermodynamic and Electron-Transfer Kinetic  
Properties of Copper(II/I) Complexes with  
Sexadentate Macrocyclic Ligands.  
Cu<sup>II/I</sup>([18]aneS<sub>4</sub>N<sub>2</sub>) and Cu<sup>II/I</sup>([18]aneS<sub>4</sub>O<sub>2</sub>)**

by Gezahegn Chaka, Ashoka Kandegedara, Mary Jane Heeg and D. B. Rorabacher\*  
Department of Chemistry, Wayne State University, Detroit, Michigan 48202, USA

**SUPPLEMENTARY INFORMATION**

**TABULATION OF EXPERIMENTAL RATE CONSTANTS**

**Table S-1.** Experimental Rate Constant Data for the Reduction of Cu<sup>II</sup>([18]aneS<sub>4</sub>O<sub>2</sub>) with Ru<sup>II</sup>(NH<sub>3</sub>)<sub>4</sub>bpy) under Second-Order Conditions in Acetonitrile at 25 °C,  $\mu = 0.10$  M (PF<sub>6</sub><sup>-</sup>).

**Table S-2.** Experimental Rate Constant Data for the Reduction of Cu<sup>II</sup>([18]aneS<sub>4</sub>O<sub>2</sub>) with Ru<sup>II</sup>(NH<sub>3</sub>)<sub>4</sub>phen) under Second-Order Conditions in Acetonitrile at 25 °C,  $\mu = 0.10$  M (ClO<sub>4</sub><sup>-</sup>),

**Table S-3.** Experimental Rate Constant Data for the Reduction of Cu<sup>II</sup>([18]aneS<sub>4</sub>O<sub>2</sub>) with Ru<sup>II</sup>(NH<sub>3</sub>)<sub>5</sub>isn) under Second-Order Conditions in Acetonitrile at 25 °C,  $\mu = 0.10$  M (ClO<sub>4</sub><sup>-</sup>).

**Table S-4.** Experimental Rate Constant Data for the Oxidation of Cu<sup>I</sup>([18]aneS<sub>4</sub>O<sub>2</sub>) with Ni<sup>III</sup>([14]aneN<sub>4</sub>) under Second-Order Conditions in Acetonitrile at 25 °C,  $\mu = 0.10$  M (ClO<sub>4</sub><sup>-</sup>).

**Table S-5.** Experimental Rate Constant Data for the Oxidation of  $\text{Cu}^{\text{I}}([\text{18}]\text{aneS}_4\text{O}_2)$  with  $\text{Ni}^{\text{III}}([\text{9}]\text{aneN}_3)_2$  under Pseudo-First-Order Conditions in Acetonitrile at 25 °C,  $\mu = 0.10$  M ( $\text{ClO}_4^-$ ).

**Table S-6.** Experimental Rate Constant Data for the Oxidation of  $\text{Cu}^{\text{I}}([\text{18}]\text{aneS}_4\text{O}_2)$  with  $\text{Fe}^{\text{III}}(\text{bpy})_3$  under Second-Order Conditions in Acetonitrile at 25 °C,  $\mu = 0.10$  M ( $\text{ClO}_4^-$ ).

**Table S-7.** Experimental Rate Constant Data for the Reduction of  $\text{Cu}^{\text{II}}([\text{18}]\text{aneS}_4\text{N}_2)$  with  $\text{Ni}^{\text{II}}(\text{cp})_2$  under Second-Order Conditions in Acetonitrile at 25 °C,  $\mu = 0.10$  M ( $\text{ClO}_4^-$ ).

**Table S-8.** Experimental Rate Constant Data for the Reduction of  $\text{Cu}^{\text{II}}([\text{18}]\text{aneS}_4\text{N}_2)$  with  $\text{Co}^{\text{II}}(\text{sep})$  under Pseudo-First-Order Conditions in Acetonitrile at 25 °C,  $\mu = 0.10$  M ( $\text{ClO}_4^-$ ).

**Table S-9.** Experimental Rate Constant Data for the Oxidation of  $\text{Cu}^{\text{I}}([\text{18}]\text{aneS}_4\text{N}_2)$  with  $\text{Co}^{\text{III}}(\text{phen})_3$  under Pseudo-First-Order Conditions in Acetonitrile at 25 °C,  $\mu = 0.10$  M ( $\text{ClO}_4^-$ ).

**Table S-10.** Experimental Rate Constant Data for the Oxidation of  $\text{Cu}^{\text{I}}([\text{18}]\text{aneS}_4\text{N}_2)$  with  $\text{Co}^{\text{III}}(\text{bpy})_3$  under Pseudo-First-Order Conditions in Acetonitrile at 25 °C,  $\mu = 0.10$  M ( $\text{ClO}_4^-$ ).

**Table S-11.** Experimental Rate Constant Data for the Oxidation of  $\text{Cu}^{\text{I}}([\text{18}]\text{aneS}_4\text{N}_2)$  with  $\text{Ru}^{\text{III}}(\text{NH}_3)_5\text{isn}$  under Second-Order Conditions in Acetonitrile at 25 °C,  $\mu = 0.10$  M ( $\text{ClO}_4^-$ ).

**Table S-12.** Experimental Rate Constant Data for the Oxidation of  $\text{Cu}^{\text{I}}([\text{18}]\text{aneS}_4\text{N}_2)$  with  $\text{Ru}^{\text{III}}(\text{NH}_3)_5\text{py}$  under Second-Order Conditions in Acetonitrile at 25 °C,  $\mu = 0.10$  M ( $\text{ClO}_4^-$ ).

**Table S-13.** Experimental Rate Constant Data for the Reduction of  $\text{Cu}^{\text{II}}([\text{18}] \text{aneS}_4\text{N}_2)$  with  $\text{Ru}^{\text{II}}(\text{NH}_3)_6$  under Pseudo-First-Order Conditions in Water at 25 °C,  $\mu = 0.10 \text{ M}$  ( $\text{NaClO}_4$ ), pH 5.0,  $[\text{Cu}^{\text{II}}([\text{18}] \text{aneS}_4\text{N}_2)] = 8.75 \mu\text{M}$ .

**Table S-14.** Experimental Rate Constant Data for the Reduction of  $\text{Cu}^{\text{II}}([\text{18}] \text{aneS}_4\text{N}_2)$  with  $\text{Ru}^{\text{II}}(\text{NH}_3)_6$  under Pseudo-First-Order Conditions in Water at 25 °C,  $\mu = 0.10 \text{ M}$  ( $\text{NaClO}_4$ ), pH 8.0,  $[\text{Cu}^{\text{II}}([\text{18}] \text{aneS}_4\text{N}_2)] = 8.09 \mu\text{M}$ .

**Table S-15.** Experimental Rate Constant Data for the Reduction of  $\text{Cu}^{\text{II}}([\text{18}] \text{aneS}_4\text{N}_2)$  with  $\text{Co}^{\text{II}}(\text{sep})$  under Pseudo-First-Order Conditions in Water at 25 °C,  $\mu = 0.10 \text{ M}$  ( $\text{NaClO}_4$ ), pH 5.0,  $[\text{Cu}^{\text{II}}([\text{18}] \text{aneS}_4\text{N}_2)] = 3.88 \mu\text{M}$ .

**Table S-16.** Experimental Rate Constant Data for the Reduction of  $\text{Cu}^{\text{II}}([\text{18}] \text{aneS}_4\text{N}_2)$  with  $\text{Co}^{\text{II}}(\text{sep})$  under Pseudo-First-Order Conditions in Water at 25 °C,  $\mu = 0.10 \text{ M}$  ( $\text{NaClO}_4$ ), pH 8.0,  $[\text{Cu}^{\text{II}}([\text{18}] \text{aneS}_4\text{N}_2)] = 4.37 \mu\text{M}$ .

**Table S-17.** Experimental Rate Constant Data for the Reduction of  $\text{Cu}^{\text{II}}([\text{18}] \text{aneS}_4\text{N}_2)$  with  $\text{Co}^{\text{II}}(\text{sep})$  under Pseudo-First-Order Conditions in Water at 25 °C,  $\mu = 0.10 \text{ M}$  ( $\text{NaClO}_4$ ), pH 10.0,  $[\text{Cu}^{\text{II}}([\text{18}] \text{aneS}_4\text{N}_2)] = 3.97 \mu\text{M}$ .

**Table S-18.** Experimental Rate Constant Data for the Oxidation of  $\text{Cu}^{\text{I}}([\text{18}] \text{aneS}_4\text{N}_2)$  with  $\text{Ru}^{\text{III}}(\text{NH}_3)_5\text{isn}$  under Pseudo-First-Order Conditions in Water at 25 °C,  $\mu = 0.10 \text{ M}$  ( $\text{NaClO}_4$ ), pH 5.0,  $[\text{Cu}^{\text{I}}([\text{18}] \text{aneS}_4\text{N}_2)] = 4.78 \mu\text{M}$ .

**Table S-19.** Experimental Rate Constant Data for the Oxidation of  $\text{Cu}^{\text{I}}([\text{18}] \text{aneS}_4\text{N}_2)$  with  $\text{Ru}^{\text{III}}(\text{NH}_3)_5\text{isn}$  under Second-Order Conditions in Water at 25 °C,  $\mu = 0.10 \text{ M}$  ( $\text{NaClO}_4$ ), pH 8.0,  $[\text{Cu}^{\text{I}}([\text{18}] \text{aneS}_4\text{N}_2)] = 6.70 \mu\text{M}$ .

**Table S-20.** Experimental Rate Constant Data for the Oxidation of  $\text{Cu}^{\text{I}}([\text{18}] \text{aneS}_4\text{N}_2)$  with  $\text{Co}^{\text{III}}(\text{bpy})_3$  under Pseudo-First-Order Conditions in Water at 25 °C,  $\mu = 0.10 \text{ M}$  ( $\text{NaClO}_4$ ), pH 5.0,  $[\text{Cu}^{\text{II}}([\text{18}] \text{aneS}_4\text{N}_2)] = 19.1 \mu\text{M}$ .

**Table S-21.** Experimental Rate Constant Data for the Oxidation of  $\text{Cu}^{\text{I}}([\text{18}] \text{aneS}_4\text{N}_2)$  with  $\text{Co}^{\text{III}}(\text{bpy})_3$  under Pseudo-First-Order Conditions in Water at 25 °C,  $\mu = 0.10 \text{ M}$  ( $\text{NaClO}_4$ ), pH 8.0,  $[\text{Cu}^{\text{II}}([\text{18}] \text{aneS}_4\text{N}_2)] = 18.8 \mu\text{M}$ .

**Table S-22.** Experimental Rate Constant Data for the Oxidation of  $\text{Cu}^{\text{I}}([\text{18}] \text{aneS}_4\text{N}_2)$  with  $\text{Co}^{\text{III}}(\text{bpy})_3$  under Pseudo-First-Order Conditions in Water at 25 °C,  $\mu = 0.10 \text{ M}$  ( $\text{NaClO}_4$ ), pH 10.0,  $[\text{Cu}^{\text{II}}([\text{18}] \text{aneS}_4\text{N}_2)] = 18.8 \mu\text{M}$ .

**Table S-23.** Experimental Rate Constant Data for the Oxidation of  $\text{Ni}^{\text{II}}(\text{cp})_2$  with  $\text{Co}^{\text{III}}(\text{dmg})_3(\text{BC}_5\text{H}_5)_2$  under Second-Order Conditions in Acetonitrile at 25 °C,  $\mu = 0.10 \text{ M}$  ( $\text{NaClO}_4$ ),  $[\text{Co}^{\text{III}}(\text{dmg})_3(\text{BC}_5\text{H}_5)_2] = 15.0 \mu\text{M}$ .

**Table S-24.** Experimental Rate Constant Data for the Reduction of  $\text{Co}^{\text{III}}(\text{phen})_3$  with  $\text{Co}^{\text{II}}(\text{dmg})_3(\text{BC}_5\text{H}_5)_2$  under Pseudo-First-Order Conditions in Acetonitrile at 25 °C,  $\mu = 0.10 \text{ M}$  ( $\text{NaClO}_4$ ),  $[\text{Co}^{\text{III}}(\text{dmg})_3(\text{BC}_5\text{H}_5)_2] = 49.4 \mu\text{M}$ .

**Table S-1.** Experimental Rate Constant Data for the Reduction of  $\text{Cu}^{\text{II}}([\text{18}]\text{aneS}_4\text{O}_2)$  with  $\text{Ru}^{\text{II}}(\text{NH}_3)_4\text{bpy}$ ) under Second-Order Conditions in Acetonitrile at 25 °C,  $\mu = 0.10 \text{ M}$  ( $\text{PF}_6^-$ ).

| $[\text{Cu}^{\text{II}}([\text{18}]\text{aneS}_4\text{O}_2)], \mu\text{M}$ | $[\text{Ru}^{\text{II}}], \mu\text{M}$ | Mean $k_{12} \times 10^{-6}, \text{M}^{-1}\text{s}^{-1}$ |
|----------------------------------------------------------------------------|----------------------------------------|----------------------------------------------------------|
| 5.55                                                                       | 14.6                                   | 3.3(3)                                                   |
| 6.70                                                                       | 15.1                                   | 3.1(2)                                                   |
| 6.70                                                                       | 18.8                                   | 2.8(2)                                                   |
| 8.80                                                                       | 24.4                                   | 3.0(1)                                                   |
| 8.80                                                                       | 34.1                                   | 3.1(2)                                                   |

**Table S-2.** Experimental Rate Constant Data for the Reduction of  $\text{Cu}^{\text{II}}([\text{18}]\text{aneS}_4\text{O}_2)$  with  $\text{Ru}^{\text{II}}(\text{NH}_3)_4\text{phen}$ ) under Second-Order Conditions in Acetonitrile at 25 °C,  $\mu = 0.10 \text{ M}$  ( $\text{ClO}_4^-$ ).

| $[\text{Cu}^{\text{II}}([\text{18}]\text{aneS}_4\text{O}_2)], \mu\text{M}$ | $[\text{Ru}^{\text{II}}], \mu\text{M}$ | Mean $k_{12} \times 10^{-6}, \text{M}^{-1}\text{s}^{-1}$ |
|----------------------------------------------------------------------------|----------------------------------------|----------------------------------------------------------|
| 10.3                                                                       | 5.94                                   | 4.3(4)                                                   |
| 14.5                                                                       | 5.94                                   | 3.5(3)                                                   |
| 14.5                                                                       | 9.90                                   | 5.9(4)                                                   |
| 20.7                                                                       | 5.94                                   | 2.5(3)                                                   |
| 20.7                                                                       | 9.90                                   | 3.5(2)                                                   |

**Table S-3.** Experimental Rate Constant Data for the Reduction of  $\text{Cu}^{\text{II}}([\text{18}]\text{aneS}_4\text{O}_2)$  with  $\text{Ru}^{\text{II}}(\text{NH}_3)_5\text{isn}$  under Second-Order Conditions in Acetonitrile at 25 °C,  $\mu = 0.10 \text{ M}$  ( $\text{ClO}_4^-$ ).

| $[\text{Cu}^{\text{II}}([\text{18}]\text{aneS}_4\text{O}_2)], \mu\text{M}$ | $[\text{Ru}^{\text{II}}], \mu\text{M}$ | Mean $k_{12} \times 10^{-7}, \text{M}^{-1}\text{s}^{-1}$ |
|----------------------------------------------------------------------------|----------------------------------------|----------------------------------------------------------|
| 4.72                                                                       | 3.97                                   | 3.9(3)                                                   |
| 7.36                                                                       | 5.95                                   | 3.6(3)                                                   |
| 56.5                                                                       | 5.95                                   | 4.7(4)                                                   |
| 56.5                                                                       | 7.95                                   | 5.2(5)                                                   |
| 10.5                                                                       | 7.95                                   | 2.8(4)                                                   |

**Table S-4.** Experimental Rate Constant Data for the Oxidation of  $\text{Cu}^{\text{I}}([\text{18}]\text{aneS}_4\text{O}_2)$  with  $\text{Ni}^{\text{III}}([\text{14}]\text{aneN}_4)$  under Second-Order Conditions in Acetonitrile at 25 °C,  $\mu = 0.10 \text{ M}$  ( $\text{ClO}_4^-$ ).

| $[\text{Cu}^{\text{I}}([\text{18}]\text{aneS}_4\text{O}_2)], \mu\text{M}$ | $[\text{Ni}^{\text{III}}], \mu\text{M}$ | Mean $k_{21} \times 10^{-5}, \text{M}^{-1}\text{s}^{-1}$ |
|---------------------------------------------------------------------------|-----------------------------------------|----------------------------------------------------------|
| 29.1                                                                      | 16.7                                    | 1.92(12)                                                 |
| 29.1                                                                      | 25.0                                    | 2.93(6)                                                  |
| 29.1                                                                      | 33.4                                    | 2.94(9)                                                  |
| 29.1                                                                      | 50.1                                    | 1.82(4)                                                  |
| 29.1                                                                      | 66.8                                    | 1.76(61)                                                 |

**Table S-5.** Experimental Rate Constant Data for the Oxidation of  $\text{Cu}^{\text{I}}([\text{18}]\text{aneS}_4\text{O}_2)$  with  $\text{Ni}^{\text{III}}([\text{9}]\text{aneN}_3)_2$  under Pseudo-First-Order Conditions in Acetonitrile at 25 °C,  $\mu = 0.10 \text{ M} (\text{ClO}_4^-)$   $[\text{Cu}^{\text{I}}([\text{18}]\text{aneS}_6)] = 8.12 \mu\text{M}$ .

| $[\text{Ru}^{\text{II}}], \mu\text{M}$ | Mean $k_{\text{obs}}, \text{s}^{-1}$ |
|----------------------------------------|--------------------------------------|
| 48.6                                   | 1.5                                  |
| 120                                    | 2.7                                  |
| 187                                    | 3.8                                  |
| 279                                    | 5.5                                  |
| 346                                    | 6.6                                  |

**Table S-6.** Experimental Rate Constant Data for the Oxidation of  $\text{Cu}^{\text{I}}([\text{18}]\text{aneS}_4\text{O}_2)$  with  $\text{Fe}^{\text{III}}(\text{bpy})_3$  under Second-Order Conditions in Acetonitrile at 25 °C,  $\mu = 0.10 \text{ M} (\text{ClO}_4^-)$ .

| $[\text{Cu}^{\text{I}}([\text{18}]\text{aneS}_4\text{O}_2)], \mu\text{M}$ | $[\text{Fe}^{\text{III}}], \mu\text{M}$ | Mean $k_{21} \times 10^{-7}, \text{M}^{-1}\text{s}^{-1}$ |
|---------------------------------------------------------------------------|-----------------------------------------|----------------------------------------------------------|
| 3.25                                                                      | 1.32                                    | 2.6(4)                                                   |
| 3.25                                                                      | 1.98                                    | 1.6(2)                                                   |
| 3.25                                                                      | 2.64                                    | 1.4(1)                                                   |
| 3.25                                                                      | 3.30                                    | 1.6(2)                                                   |

**Table S-7.** Experimental Rate Constant Data for the Reduction of  $\text{Cu}^{\text{II}}([\text{18}] \text{aneS}_4\text{N}_2)$  with  $\text{Ni}^{\text{II}}(\text{cp})_2$  under Second-Order Conditions in Acetonitrile at 25 °C,  $\mu = 0.10 \text{ M} (\text{ClO}_4^-)$ ,  $[\text{Cu}^{\text{II}}([\text{18}] \text{aneS}_4\text{N}_2)] = 13.1 \text{ } \mu\text{M}$ .

| $[\text{Ni}^{\text{II}}], \mu\text{M}$ | Mean $k_{12} \times 10^{-6}, \text{M}^{-1}\text{s}^{-1}$ |
|----------------------------------------|----------------------------------------------------------|
| 32.4                                   | 2.50(18)                                                 |
| 48.6                                   | 2.62(17)                                                 |
| 65.0                                   | 2.57(18)                                                 |
| 81.0                                   | 2.50(14)                                                 |
| 162                                    | 2.52(16)                                                 |

**Table S-8.** Experimental Rate Constant Data for the Reduction of  $\text{Cu}^{\text{II}}([\text{18}] \text{aneS}_4\text{N}_2)$  with  $\text{Co}^{\text{II}}(\text{sep})$  under Pseudo-First-Order Conditions in Acetonitrile at 25 °C,  $\mu = 0.10 \text{ M} (\text{ClO}_4^-)$ ,  $[\text{Cu}^{\text{II}}([\text{18}] \text{aneS}_4\text{N}_2)] = 8.35 \text{ } \mu\text{M}$ .

| $[\text{Co}^{\text{II}}], \mu\text{M}$ | Mean $k_{\text{obs}}, \text{s}^{-1}$ |
|----------------------------------------|--------------------------------------|
| 49.5                                   | 15.5(16)                             |
| 99.1                                   | 23.2(29)                             |
| 149                                    | 32.4(15)                             |
| 198                                    | 36.9(49)                             |
| 248                                    | 49.8(56)                             |

**Table S-9.** Experimental Rate Constant Data for the Oxidation of  $\text{Cu}^{\text{I}}([\text{18}]\text{aneS}_4\text{N}_2)$  with  $\text{Co}^{\text{III}}(\text{phen})_3$  under Pseudo-First-Order Conditions in Acetonitrile at 25 °C,  $\mu = 0.10 \text{ M}$  ( $\text{ClO}_4^-$ ),  $[\text{Cu}^{\text{I}}([\text{18}]\text{aneS}_4\text{N}_2)] = 7.80 \text{ }\mu\text{M}$ .

| $[\text{Co}^{\text{II}}], \mu\text{M}$ | Mean $k_{\text{obs}}, \text{s}^{-1}$ |
|----------------------------------------|--------------------------------------|
| 87.8                                   | 2.10(2)                              |
| 186                                    | 4.79(5)                              |
| 366                                    | 8.16(16)                             |
| 607                                    | 12.2(34)                             |
| 761                                    | 15.2(49)                             |

**Table S-10.** Experimental Rate Constant Data for the Oxidation of  $\text{Cu}^{\text{I}}([\text{18}]\text{aneS}_4\text{N}_2)$  with  $\text{Co}^{\text{III}}(\text{bpy})_3$  under Pseudo-First-Order Conditions in Acetonitrile at 25 °C,  $\mu = 0.10 \text{ M}$  ( $\text{ClO}_4^-$ ),  $[\text{Cu}^{\text{I}}([\text{18}]\text{aneS}_4\text{N}_2)] = 23.4 \text{ }\mu\text{M}$ .

| $[\text{Co}^{\text{III}}], \text{mM}$ | Mean $k_{\text{obs}}, \text{s}^{-1}$ |
|---------------------------------------|--------------------------------------|
| 0.203                                 | 2.28(2)                              |
| 0.406                                 | 4.68(6)                              |
| 0.810                                 | 9.78(17)                             |
| 1.22                                  | 14.5(4)                              |
| 1.62                                  | 19.8(7)                              |

**Table S-11.** Experimental Rate Constant Data for the Oxidation of  $\text{Cu}^{\text{I}}([\text{18}]\text{aneS}_4\text{N}_2)$  with  $\text{Ru}^{\text{III}}(\text{NH}_3)_5\text{isn}$  under Second-Order Conditions in Acetonitrile at 25 °C,  $\mu = 0.10 \text{ M}$  ( $\text{ClO}_4^-$ ),  $[\text{Cu}^{\text{I}}([\text{18}]\text{aneS}_4\text{N}_2)] = 6.51 \mu\text{M}$ .

| $[\text{Ru}^{\text{III}}], \mu\text{M}$ | Mean $k_{21} \times 10^{-7}, \text{M}^{-1}\text{s}^{-1}$ |
|-----------------------------------------|----------------------------------------------------------|
| 3.76                                    | 5.3(4)                                                   |
| 4.70                                    | 7.8(9)                                                   |
| 8.47                                    | 5.4(3)                                                   |
| 10.3                                    | 2.7(1)                                                   |
| 14.1                                    | 1.2(1)                                                   |

**Table S-12.** Experimental Rate Constant Data for the Oxidation of  $\text{Cu}^{\text{I}}([\text{18}]\text{aneS}_4\text{N}_2)$  with  $\text{Ru}^{\text{III}}(\text{NH}_3)_5\text{py}$  under Second-Order Conditions in Acetonitrile at 25 °C,  $\mu = 0.10 \text{ M}$  ( $\text{ClO}_4^-$ ),  $[\text{Ru}^{\text{III}}(\text{NH}_3)_5\text{py}] = 12.3 \mu\text{M}$ .

| $[\text{Cu}^{\text{I}}], \mu\text{M}$ | Mean $k_{21} \times 10^{-6}, \text{M}^{-1}\text{s}^{-1}$ |
|---------------------------------------|----------------------------------------------------------|
| 58.3                                  | 2.84(28)                                                 |
| 77.8                                  | 3.17(25)                                                 |
| 87.5                                  | 3.28(25)                                                 |
| 97.2                                  | 2.79(22)                                                 |

**Table S-13.** Experimental Rate Constant Data for the Reduction of  $\text{Cu}^{\text{II}}([\text{18}]\text{aneS}_4\text{N}_2)$  with  $\text{Ru}^{\text{II}}(\text{NH}_3)_6$  under Pseudo-First-Order Conditions in Water at 25 °C,  $\mu = 0.10 \text{ M}$  ( $\text{NaClO}_4$ ), pH 5.0,  $[\text{Cu}^{\text{II}}([\text{18}]\text{aneS}_4\text{N}_2)] = 8.75 \mu\text{M}$ .

| $[\text{CRu}^{\text{II}}], \mu\text{M}$ | Mean $k_{\text{obs}}, \text{s}^{-1}$ |
|-----------------------------------------|--------------------------------------|
| 75.6                                    | 0.170(18)                            |
| 151                                     | 0.423(25)                            |
| 227                                     | 0.791(16)                            |
| 302                                     | 0.971(79)                            |
| 378                                     | 1.44(13)                             |

**Table S-14.** Experimental Rate Constant Data for the Reduction of  $\text{Cu}^{\text{II}}([\text{18}]\text{aneS}_4\text{N}_2)$  with  $\text{Ru}^{\text{II}}(\text{NH}_3)_6$  under Pseudo-First-Order Conditions in Water at 25 °C,  $\mu = 0.10 \text{ M}$  ( $\text{NaClO}_4$ ), pH 8.0,  $[\text{Cu}^{\text{II}}([\text{18}]\text{aneS}_4\text{N}_2)] = 8.09 \mu\text{M}$ .

| $[\text{Ru}^{\text{II}}], \mu\text{M}$ | Mean $k_{\text{obs}}, \text{s}^{-1}$ |
|----------------------------------------|--------------------------------------|
| 69.9                                   | 0.321(15)                            |
| 140                                    | 0.577(17)                            |
| 210                                    | 0.762(35)                            |
| 280                                    | 0.981(72)                            |
| 349                                    | 1.23(81)                             |

**Table S-15.** Experimental Rate Constant Data for the Reduction of  $\text{Cu}^{\text{II}}([\text{18}] \text{aneS}_4\text{N}_2)$  with  $\text{Co}^{\text{II}}(\text{sep})$  under Pseudo-First-Order Conditions in Water at 25 °C,  $\mu = 0.10 \text{ M}$  ( $\text{NaClO}_4$ ), pH 5.0,  $[\text{Cu}^{\text{II}}([\text{18}] \text{aneS}_4\text{N}_2)] = 3.88 \mu\text{M}$ .

| $[\text{Co}^{\text{II}}], \mu\text{M}$ | Mean $k_{\text{obs}}, \text{s}^{-1}$ |
|----------------------------------------|--------------------------------------|
| 45.6                                   | 7.86                                 |
| 91.2                                   | 16.6                                 |
| 182                                    | 34.2                                 |
| 274                                    | 41.1                                 |
| 365                                    | 50.5                                 |

**Table S-16.** Experimental Rate Constant Data for the Reduction of  $\text{Cu}^{\text{II}}([\text{18}] \text{aneS}_4\text{N}_2)$  with  $\text{Co}^{\text{II}}(\text{sep})$  under Pseudo-First-Order Conditions in Water at 25 °C,  $\mu = 0.10 \text{ M}$  ( $\text{NaClO}_4$ ), pH 8.0,  $[\text{Cu}^{\text{II}}([\text{18}] \text{aneS}_4\text{N}_2)] = 4.37 \mu\text{M}$ .

| $[\text{Co}^{\text{II}}], \mu\text{M}$ | Mean $k_{\text{obs}}, \text{s}^{-1}$ |
|----------------------------------------|--------------------------------------|
| 110                                    | 15.1                                 |
| 266                                    | 45.5                                 |
| 440                                    | 71.3                                 |
| 660                                    | 114.6                                |
| 880                                    | 166.5                                |

**Table S-17.** Experimental Rate Constant Data for the Reduction of  $\text{Cu}^{\text{II}}([\text{18}]_{\text{aneS}_4\text{N}_2})$  with  $\text{Co}^{\text{II}}(\text{sep})$  under Pseudo-First-Order Conditions in Water at 25 °C,  $\mu = 0.10 \text{ M}$  ( $\text{NaClO}_4$ ), pH 10.0,  $[\text{Cu}^{\text{II}}([\text{18}]_{\text{aneS}_4\text{N}_2})] = 3.97 \mu\text{M}$ .

| $[\text{Co}^{\text{II}}], \mu\text{M}$ | Mean $k_{\text{obs}}, \text{s}^{-1}$ |
|----------------------------------------|--------------------------------------|
| 66.4                                   | 6.66                                 |
| 102                                    | 10.2                                 |
| 284                                    | 28.3                                 |
| 580                                    | 58.0                                 |
| 887                                    | 88.7                                 |

**Table S-18.** Experimental Rate Constant Data for the Oxidation of  $\text{Cu}^{\text{I}}([\text{18}]_{\text{aneS}_4\text{N}_2})$  with  $\text{Ru}^{\text{III}}(\text{NH}_3)_5\text{isn}$  under Pseudo-First-Order Conditions in Water at 25 °C,  $\mu = 0.10 \text{ M}$  ( $\text{NaClO}_4$ ), pH 5.0,  $[\text{Cu}^{\text{I}}([\text{18}]_{\text{aneS}_4\text{N}_2})] = 4.78 \mu\text{M}$ .

| $[\text{Ru}^{\text{III}}], \mu\text{M}$ | Mean $k_{\text{obs}}, \text{s}^{-1}$ |
|-----------------------------------------|--------------------------------------|
| 39.2                                    | 1.11                                 |
| 65.3                                    | 1.96                                 |
| 91.4                                    | 2.89                                 |
| 131                                     | 4.16                                 |
| 196                                     | 6.07                                 |

**Table S-19.** Experimental Rate Constant Data for the Oxidation of  $\text{Cu}^{\text{I}}([\text{18}] \text{aneS}_4\text{N}_2)$  with  $\text{Ru}^{\text{III}}(\text{NH}_3)_5\text{isn}$  under Second-Order Conditions in Water at 25 °C,  $\mu = 0.10 \text{ M}$  ( $\text{NaClO}_4$ ), pH 8.0,  $[\text{Cu}^{\text{II}}([\text{18}] \text{aneS}_4\text{N}_2)] = 6.70 \mu\text{M}$ .

| $[\text{Ru}^{\text{III}}], \mu\text{M}$ | Mean $k_{21}, \text{M}^{-1} \text{s}^{-1}$ |
|-----------------------------------------|--------------------------------------------|
| 14.5                                    | 7.34(1)                                    |
| 21.7                                    | 5.99(2)                                    |
| 29.0                                    | 6.09(1)                                    |
| 36.2                                    | 6.34(2)                                    |
| 50.5                                    | 5.88(1)                                    |

**Table S-20.** Experimental Rate Constant Data for the Oxidation of  $\text{Cu}^{\text{I}}([\text{18}] \text{aneS}_4\text{N}_2)$  with  $\text{Co}^{\text{III}}(\text{bpy})_3$  under Pseudo-First-Order Conditions in Water at 25 °C,  $\mu = 0.10 \text{ M}$  ( $\text{NaClO}_4$ ), pH 5.0,  $[\text{Cu}^{\text{II}}([\text{18}] \text{aneS}_4\text{N}_2)] = 19.1 \mu\text{M}$ .

| $[\text{Co}^{\text{III}}], \text{mM}$ | Mean $k_{\text{obs}}, \text{s}^{-1}$ |
|---------------------------------------|--------------------------------------|
| 0.209                                 | 0.144(3)                             |
| 0.418                                 | 0.250(39)                            |
| 0.627                                 | 0.368(59)                            |
| 0.836                                 | 0.471(12)                            |
| 1.04                                  | 0.594(12)                            |

**Table S-21.** Experimental Rate Constant Data for the Oxidation of  $\text{Cu}^{\text{I}}([\text{18}]\text{aneS}_4\text{N}_2)$  with  $\text{Co}^{\text{III}}(\text{bpy})_3$  under Pseudo-First-Order Conditions in Water at 25 °C,  $\mu = 0.10 \text{ M}$  ( $\text{NaClO}_4$ ), pH 8.0,  $[\text{Cu}^{\text{II}}([\text{18}]\text{aneS}_4\text{N}_2)] = 18.8 \mu\text{M}$ .

| $[\text{Co}^{\text{III}}], \text{mM}$ | Mean $k_{\text{obs}}, \text{s}^{-1}$ |
|---------------------------------------|--------------------------------------|
| 0.104                                 | 0.650(9)                             |
| 0.207                                 | 1.36(3)                              |
| 0.414                                 | 2.66(6)                              |
| 0.621                                 | 4.28(12)                             |
| 0.828                                 | 6.42(12)                             |

**Table S-22.** Experimental Rate Constant Data for the Oxidation of  $\text{Cu}^{\text{I}}([\text{18}]\text{aneS}_4\text{N}_2)$  with  $\text{Co}^{\text{III}}(\text{bpy})_3$  under Pseudo-First-Order Conditions in Water at 25 °C,  $\mu = 0.10 \text{ M}$  ( $\text{NaClO}_4$ ), pH 10.0,  $[\text{Cu}^{\text{II}}([\text{18}]\text{aneS}_4\text{N}_2)] = 18.8 \mu\text{M}$ .

| $[\text{Co}^{\text{III}}], \text{mM}$ | Mean $k_{\text{obs}}, \text{s}^{-1}$ |
|---------------------------------------|--------------------------------------|
| 0.107                                 | 0.738(4)                             |
| 0.215                                 | 1.44(2)                              |
| 0.430                                 | 2.72(3)                              |
| 0.645                                 | 4.29(7)                              |
| 0.860                                 | 5.52(17)                             |

**Table S-23.** Experimental Rate Constant Data for the Oxidation of  $\text{Ni}^{\text{II}}(\text{cp})_2$  with  $\text{Co}^{\text{III}}(\text{dmg})_3(\text{BC}_5\text{H}_5)_2$  under Second-Order Conditions in Acetonitrile at 25 °C,  $\mu = 0.10 \text{ M}$  ( $\text{NaClO}_4$ ),  $[\text{Co}^{\text{III}}(\text{dmg})_3(\text{BC}_5\text{H}_5)_2] = 15.0 \mu\text{M}$ .

| $[\text{Ni}^{\text{II}}], \mu\text{M}$ | Mean $k_{12} \times 10^{-6}, \text{M}^{-1} \text{s}^{-1}$ |
|----------------------------------------|-----------------------------------------------------------|
| 20.6                                   | 4.09(24)                                                  |
| 30.9                                   | 3.20(14)                                                  |
| 41.2                                   | 2.89(11)                                                  |
| 51.5                                   | 2.45(12)                                                  |
| 77.2                                   | 2.50(18)                                                  |

**Table S-24.** Experimental Rate Constant Data for the Reduction of  $\text{Co}^{\text{III}}(\text{phen})_3$  with  $\text{Co}^{\text{II}}(\text{dmg})_3(\text{BC}_5\text{H}_5)_2$  under Pseudo-First-Order Conditions in Acetonitrile at 25 °C,  $\mu = 0.10 \text{ M}$  ( $\text{NaClO}_4$ ),  $[\text{Co}^{\text{II}}(\text{dmg})_3(\text{BC}_5\text{H}_5)_2] = 49.4 \mu\text{M}$ .

| $[\text{Co}^{\text{III}}], \text{mM}$ | Mean $k_{\text{obs}}, \text{s}^{-1}$ |
|---------------------------------------|--------------------------------------|
| 0.51                                  | 0.171(3)                             |
| 1.02                                  | 0.339(7)                             |
| 1.53                                  | 0.526(7)                             |
| 2.04                                  | 0.721(9)                             |
| 2.55                                  | 0.921(10)                            |
